# Supplementary material for: Intermolecular interactions boost aggregation induced emission in carbazole Schiff base derivatives
Source: Royal Society of Chemistry journal article supplement (doi:10.1039/c6ob02181f), 2016-11-21
Supplement: c6ob02181f1.pdf [file c6ob02181f1.pdf]

## Supporting Information (SI)

### Intermolecular interactions boost aggregation induced emission in carbazole Schiff base derivatives

Xiaoping Gan <sup>a, b</sup>, Guangjin Liu <sup>a</sup>, Mingjie Chu <sup>a</sup>, Wengang Xi <sup>b</sup>, Zili Ren <sup>a</sup>, Xiuli Zhang <sup>a</sup>,  
Yupeng Tian <sup>b</sup>, Hongping Zhou <sup>b\*</sup>

<sup>a</sup> *Department of Applied Chemistry, School of Science, Anhui Agricultural University, 230036 Hefei, P. R. China.*

<sup>b</sup> *College of Chemistry and Chemical Engineering, Anhui University and Key Laboratory of Functional Inorganic Materials Chemistry of Anhui Province, 230601, Hefei, P.R. China.*

*Corresponding author. Fax: +86-551-63861279; Tel: +86-551-63861279*

*E-mail address: zhpzhp@263.net*

**Figure S1:** The characterization data of compounds **1-6**

**Figure S2:** UV-Vis (a) and fluorescence (b) spectra of compound **2** in six organic solvents with different polarities at a concentration of  $2 \times 10^{-5} \text{ mol L}^{-1}$ .

**Figure S3:** UV-Vis (a) and fluorescence (b) spectra of compound **3** in six organic solvents with different polarities at a concentration of  $2 \times 10^{-5} \text{ mol L}^{-1}$ .

**Figure S4:** UV-Vis (a) and fluorescence (b) spectra of compound **4** in six organic solvents with different polarities at a concentration of  $2 \times 10^{-5} \text{ mol L}^{-1}$ .

**Figure S5:** UV-Vis (a) and fluorescence (b) spectra of compound **5** in six organic solvents with different polarities at a concentration of  $2 \times 10^{-5} \text{ mol L}^{-1}$ .

**Figure S6:** UV-Vis (a) and fluorescence (b) spectra of compound **6** in six organic solvents with different polarities at a concentration of  $2 \times 10^{-5} \text{ mol L}^{-1}$ .

**Figure S7:** UV-Vis (a) and fluorescence (b) spectra of compound **2** in water/acetonitrile mixtures with different  $f_w$  at a concentration of  $2.0 \times 10^{-5} \text{ M}$ .

**Figure S8:** UV-Vis (a) and fluorescence (b) spectra of compound **3** in water/acetonitrile mixtures with different  $f_w$  at a concentration of  $2.0 \times 10^{-5} \text{ M}$ .

**Figure S9:** UV-Vis (a) and fluorescence (b) spectra of compound **4** in water/acetonitrile mixtures with different  $f_w$  at a concentration of  $2.0 \times 10^{-5} \text{ M}$ .

**Figure S10:** UV-Vis (a) and fluorescence (b) spectra of compound **5** in water/acetonitrile mixtures with different  $f_w$  at a concentration of  $2.0 \times 10^{-5} \text{ M}$ .

**Figure S11:** MTT assay of Hela cells treated with compounds **1-6** at different concentrations for 24 h

**Table S1** Crystal data of compounds **1, 2, 3, 5** and **6**

**Figure S1a:**  $^1\text{H}$  NMR,  $^{13}\text{C}$  NMR, IR and ESI MS spectra of compound **1**.

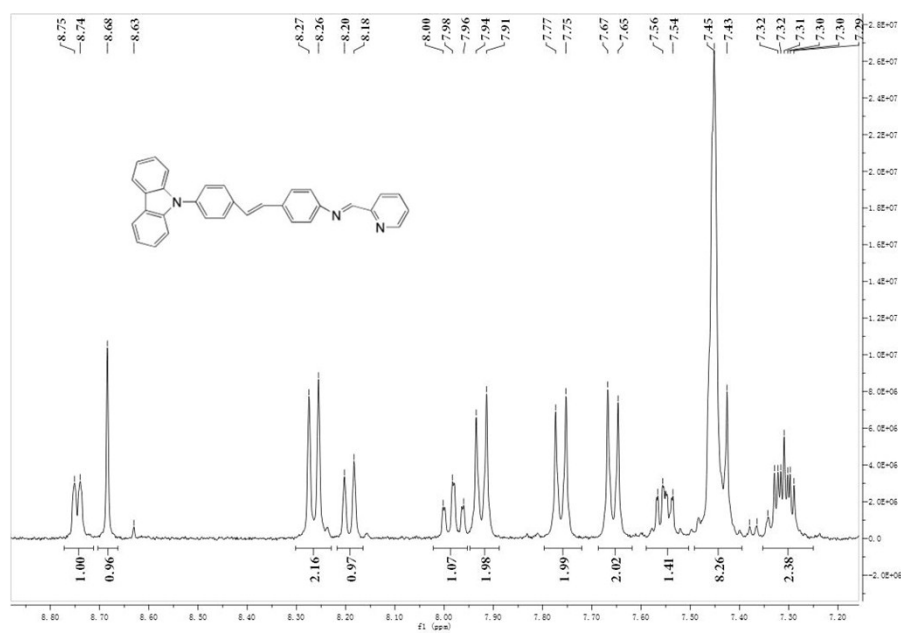

The  $^1\text{H}$  NMR (400MHz) spectrum of compound **1** in  $\text{DMSO-}d_6$

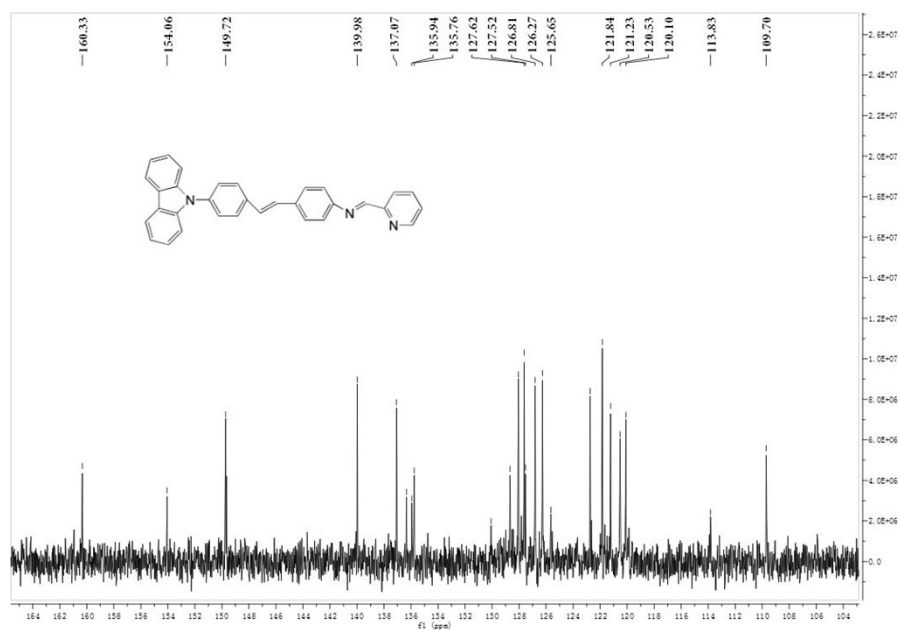

The  $^{13}\text{C}$  NMR (100 MHz) spectrum of compound **1** in  $\text{DMSO-}d_6$

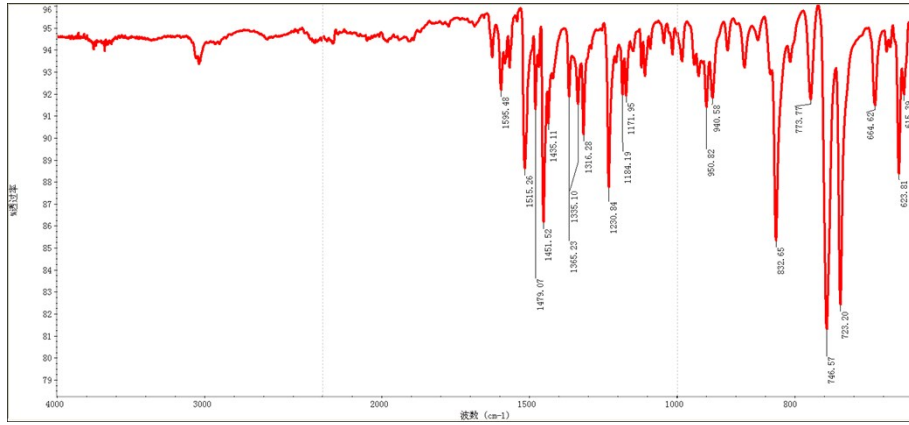

IR spectrum of compound 1

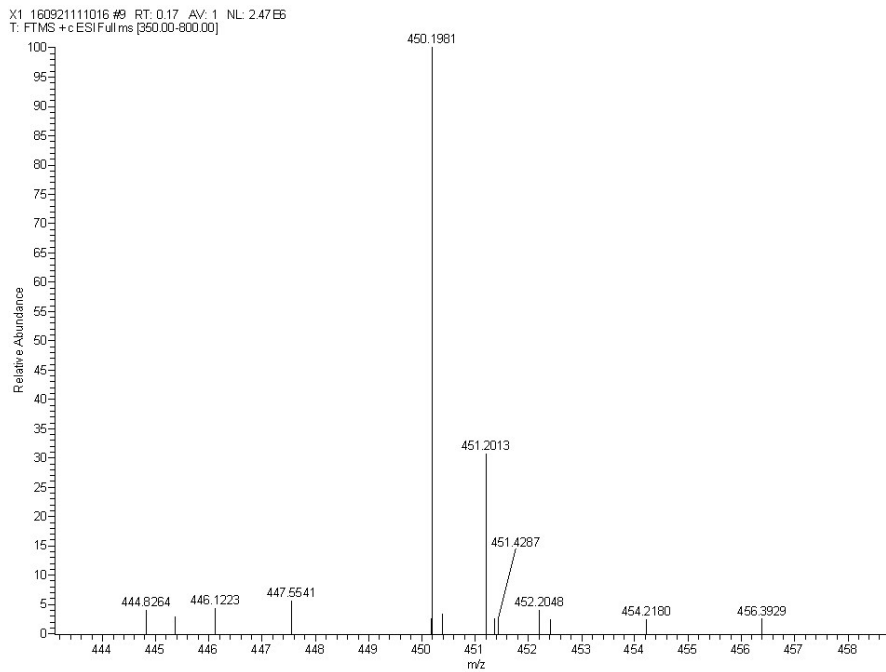

ESI MS of compound 1

**Figure S1b:**  $^1\text{H}$  NMR,  $^{13}\text{C}$  NMR, IR and ESI MS spectra of compound **2**.

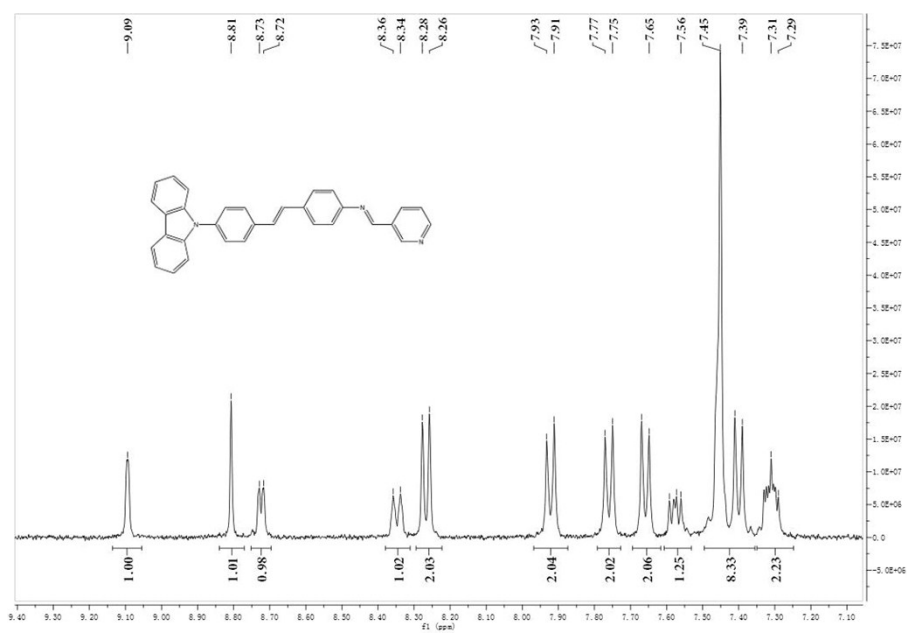

The  $^1\text{H}$  NMR (400MHz) spectrum of compound **2** in  $\text{DMSO-}d_6$

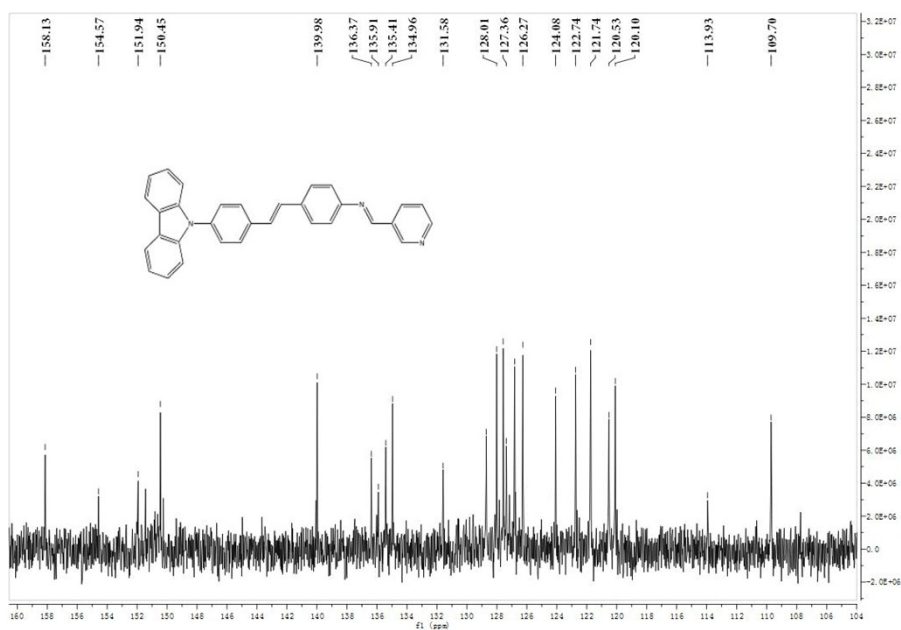

The  $^{13}\text{C}$  NMR (100 MHz) spectrum of compound **2** in  $\text{DMSO-}d_6$

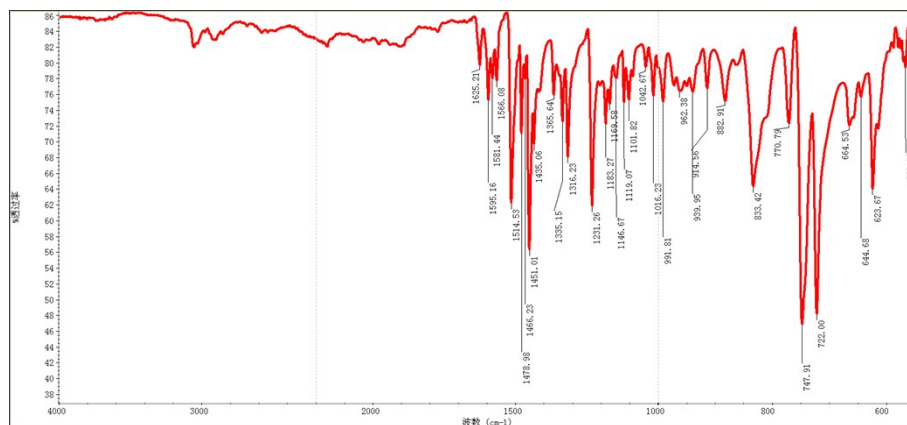

IR spectrum of compound 2

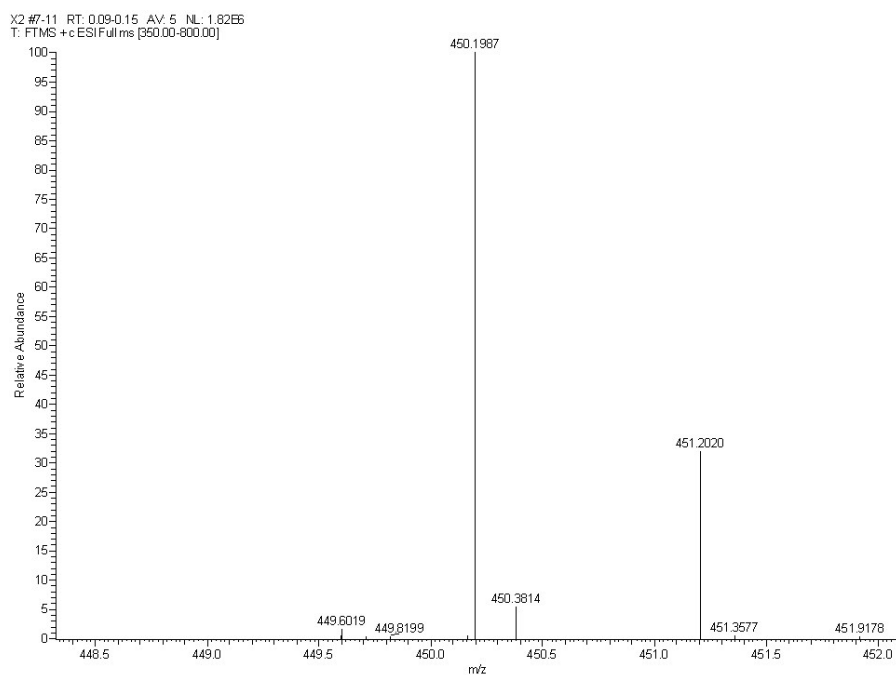

ESI MS of compound 2

Figure S1c:  $^1\text{H}$  NMR,  $^{13}\text{C}$  NMR, IR and ESI MS spectra of compound **3**.

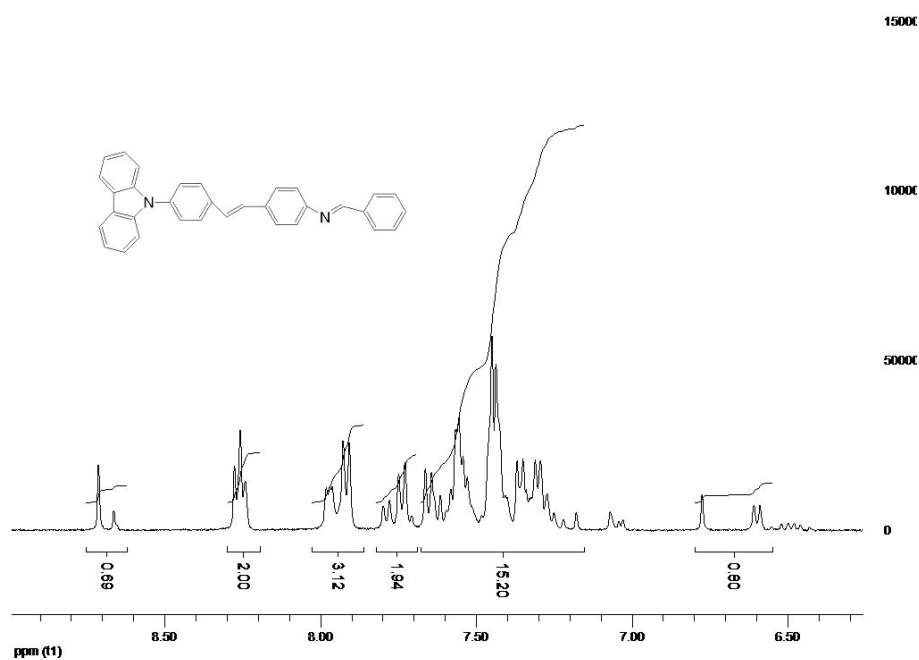

The  $^1\text{H}$  NMR (400MHz) spectrum of compound **3** in  $\text{DMSO}-d_6$

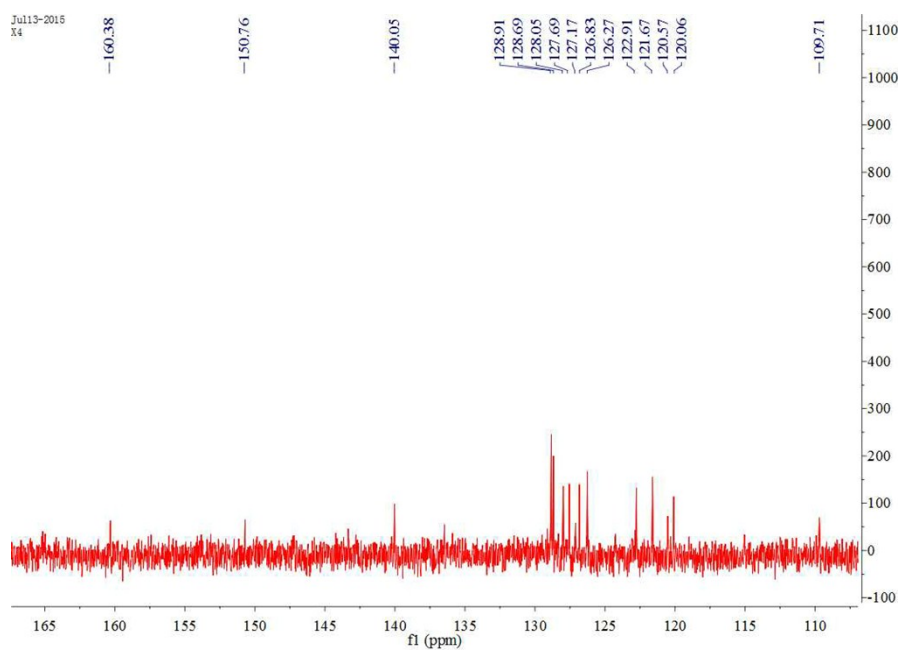

The  $^{13}\text{C}$  NMR (100 MHz) spectrum of compound **3** in  $\text{DMSO}-d_6$

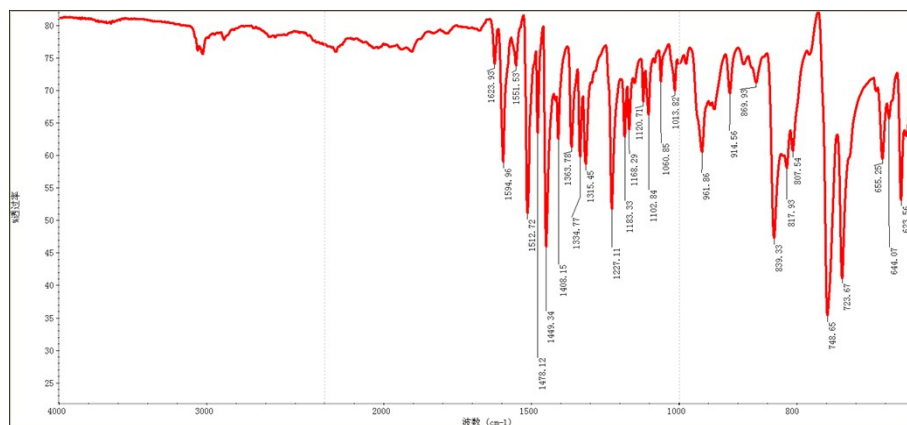

IR spectrum of compound 3

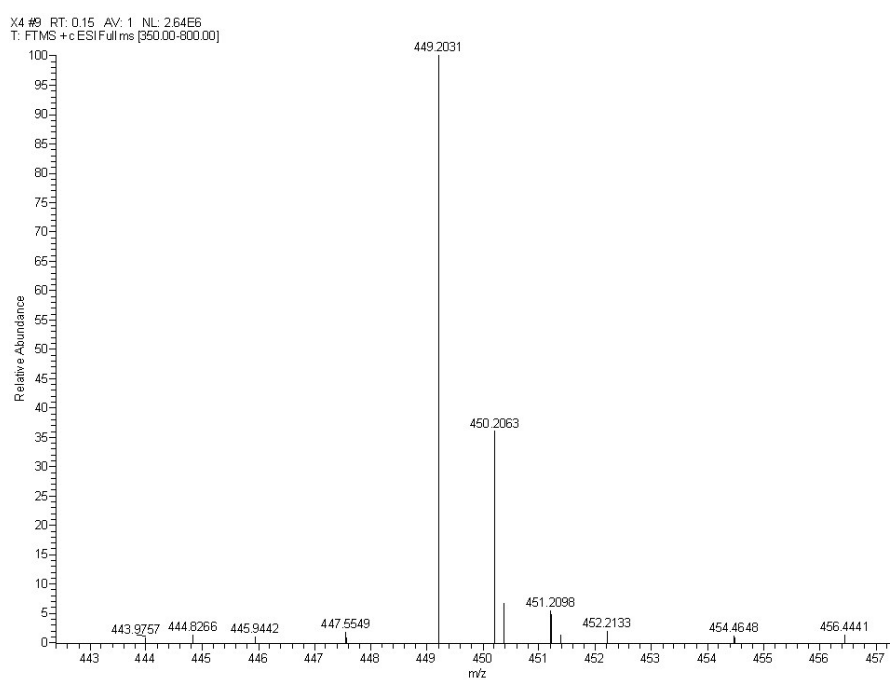

ESI MS of compound 3



Figure S1d:  $^1\text{H}$  NMR,  $^{13}\text{C}$  NMR, IR and ESI MS spectra of compound 4.

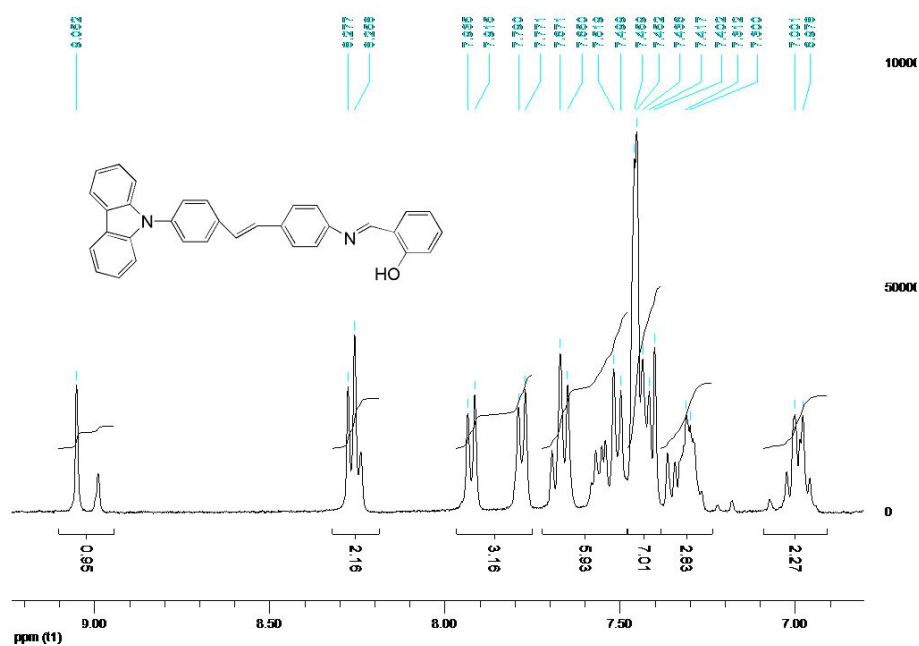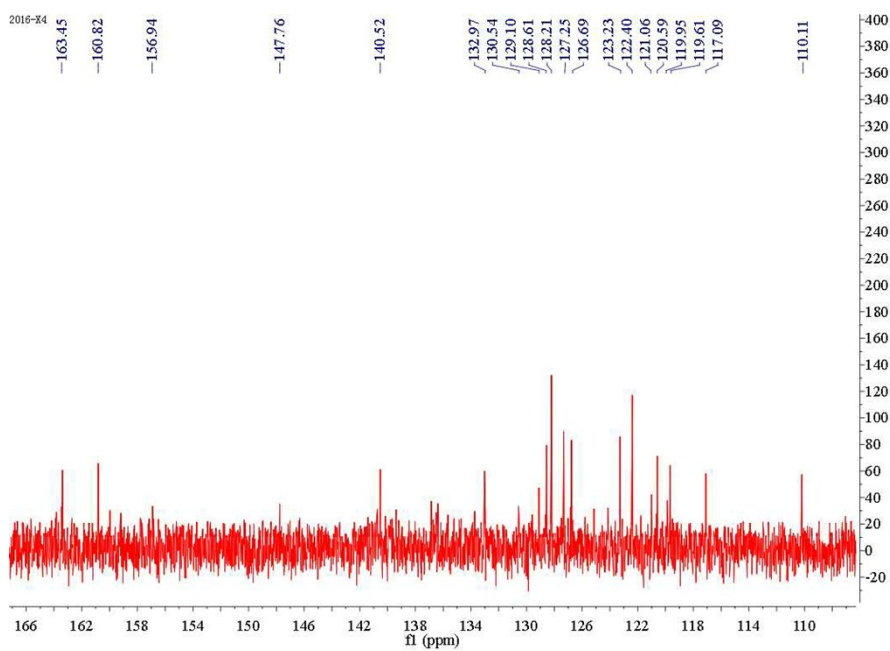

The  $^{13}\text{C}$  NMR (100 MHz) spectrum of compound 4 in  $\text{DMSO}-d_6$

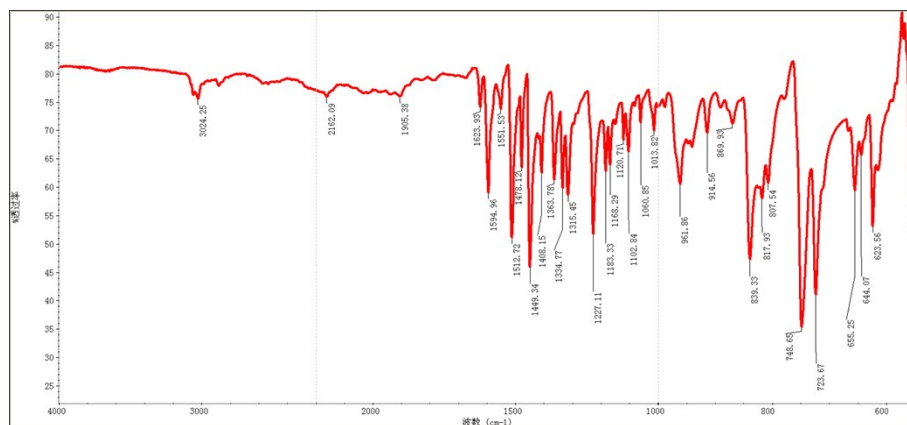

IR spectrum of compound 4

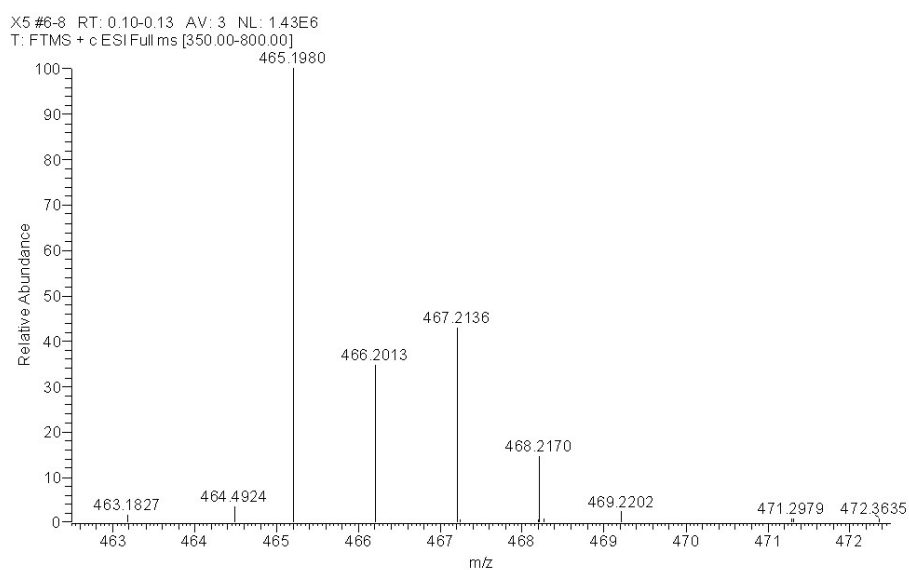

ESI MS of compound 4

**Figure S1e:**  $^1\text{H}$  NMR,  $^{13}\text{C}$  NMR, IR and ESI MS spectra of compound 5.

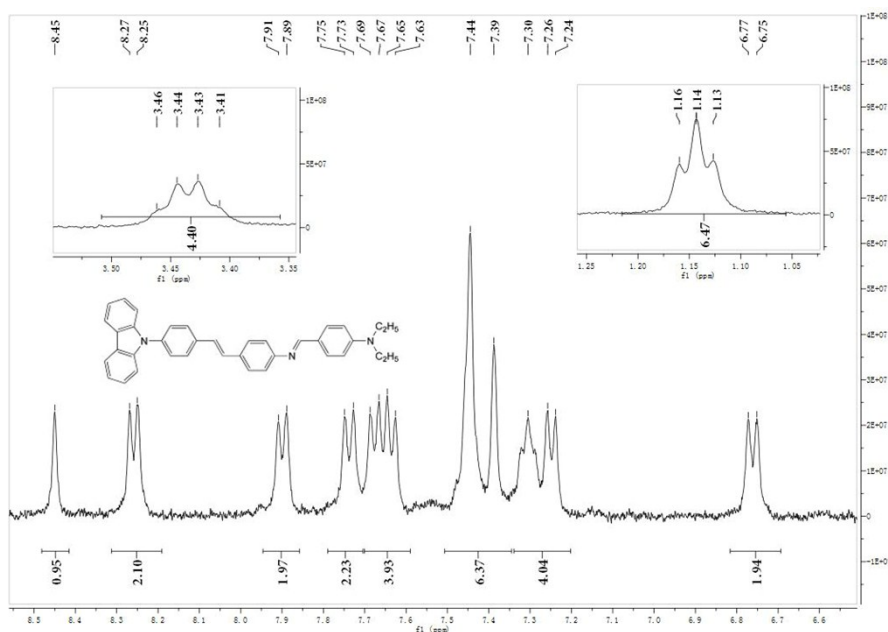

The <sup>1</sup>H NMR (400MHz) spectrum of compound **5** in DMSO-*d*<sub>6</sub>

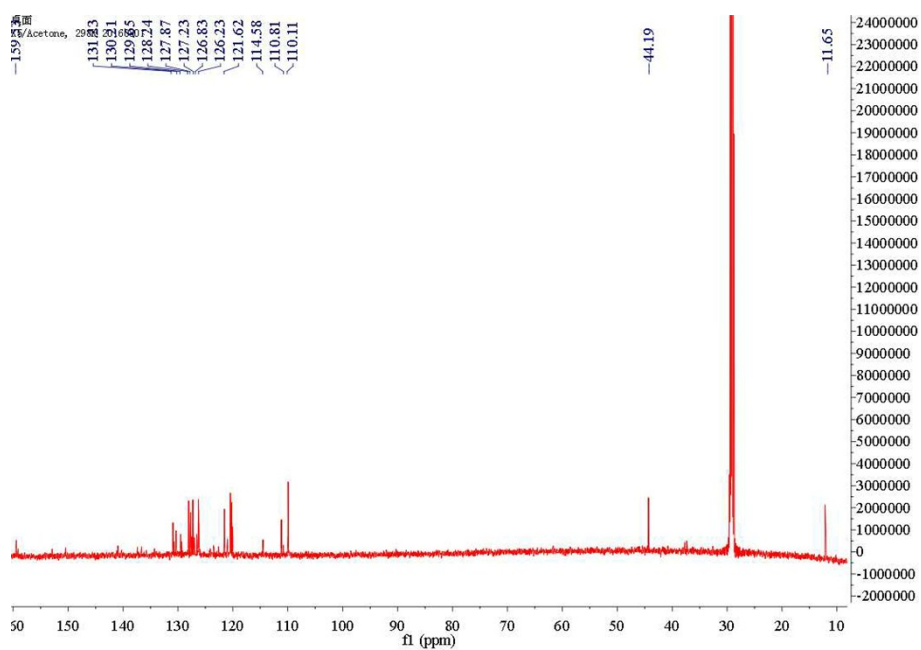

The <sup>13</sup>C NMR (100 MHz) spectrum of compound **5** in CD<sub>3</sub>COCD<sub>3</sub>

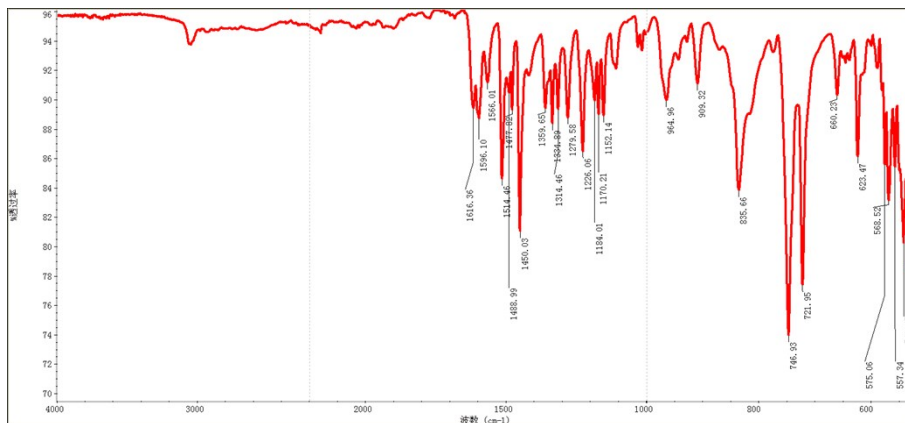

IR spectrum of compound 5

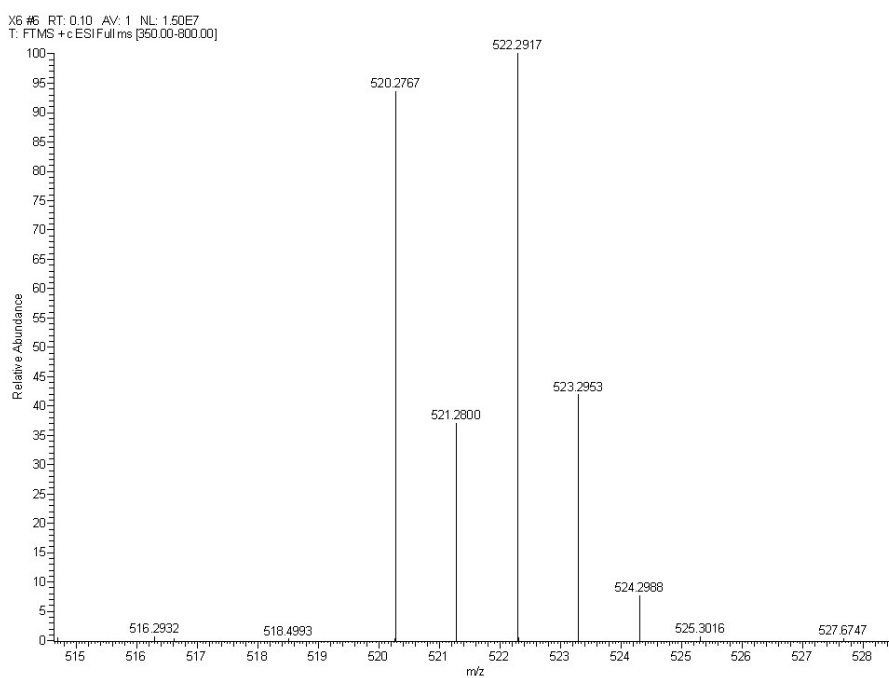

ESI MS of compound 5

**Figure S1f:**  $^1\text{H}$  NMR,  $^{13}\text{C}$  NMR, IR and ESI MS spectra of compound **6**.

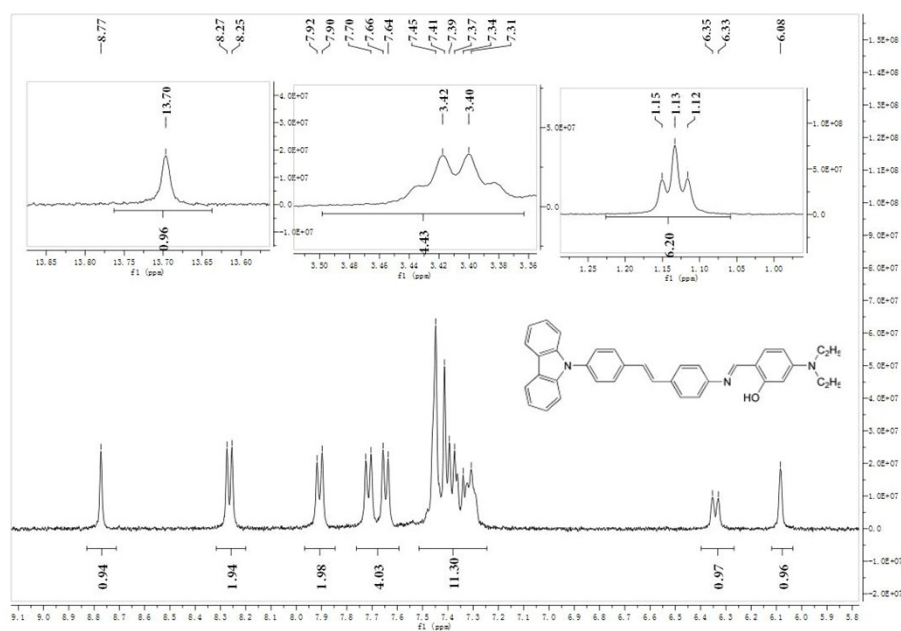

The  $^1\text{H}$  NMR (400MHz) spectrum of compound **6** in  $\text{DMSO-}d_6$

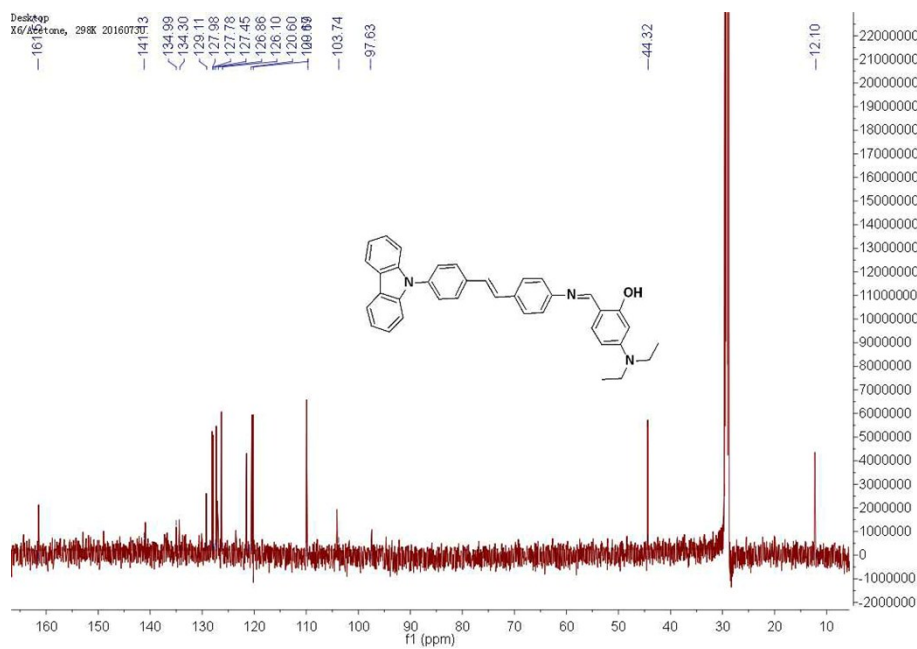

The  $^{13}\text{C}$  NMR (100 MHz) spectrum of the compound **6** in  $\text{CD}_3\text{COCD}_3$

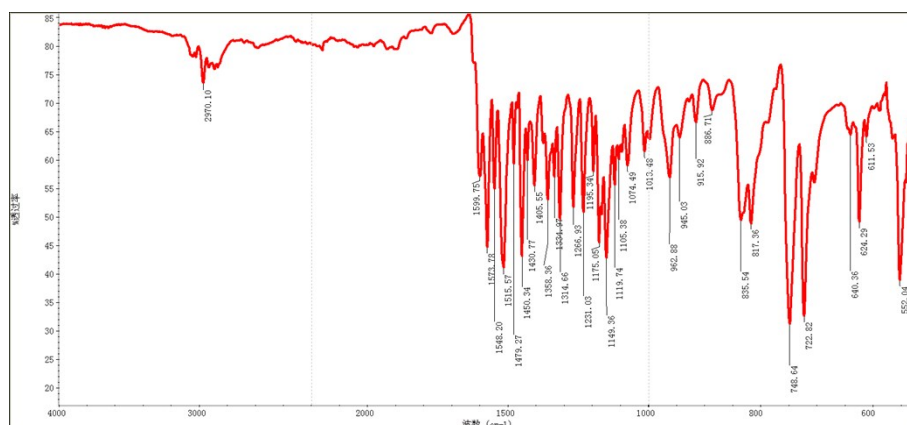

IR spectrum of compound 6

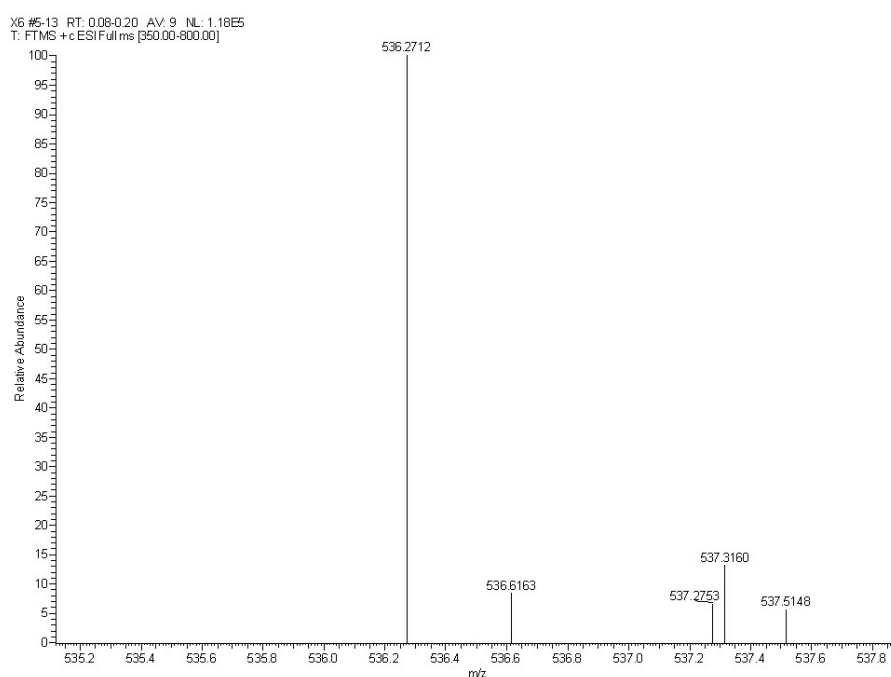

ESI MS of compound 6

**Figure S2:** UV-Vis (a) and fluorescence (b) spectra of compound 2 in six organic solvents with different polarities at a concentration of  $2 \times 10^{-5} \text{ mol L}^{-1}$ .

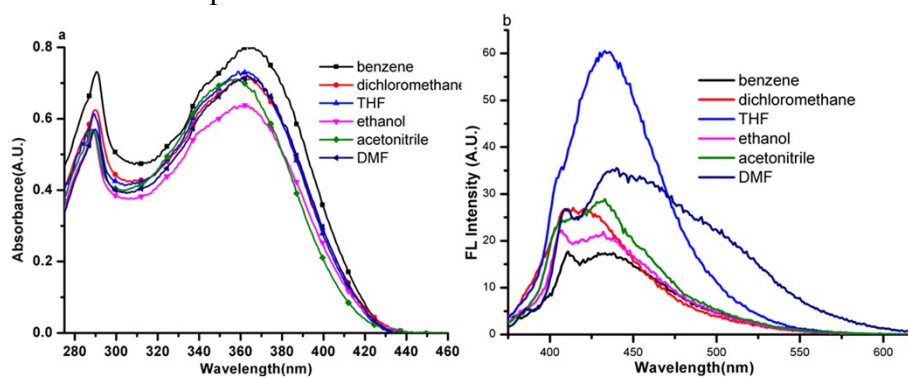

**Figure S3:** UV-Vis (a) and fluorescence (b) spectra of compound **3** in six organic solvents with different polarities at a concentration of  $2 \times 10^{-5} \text{ mol L}^{-1}$ .

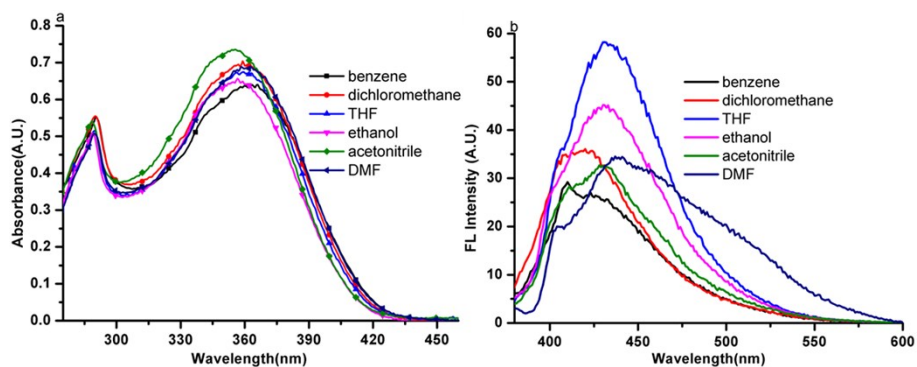

**Figure S4:** UV-Vis (a) and fluorescence (b) spectra of compound **4** in six organic solvents with different polarities at a concentration of  $2 \times 10^{-5} \text{ mol L}^{-1}$ .

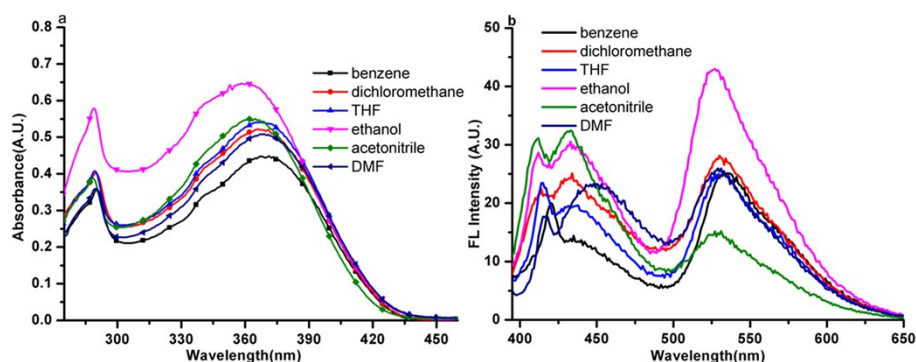

**Figure S5:** UV-Vis (a) and fluorescence (b) spectra of compound **5** in six organic solvents with different polarities at a concentration of  $2 \times 10^{-5} \text{ mol L}^{-1}$ .

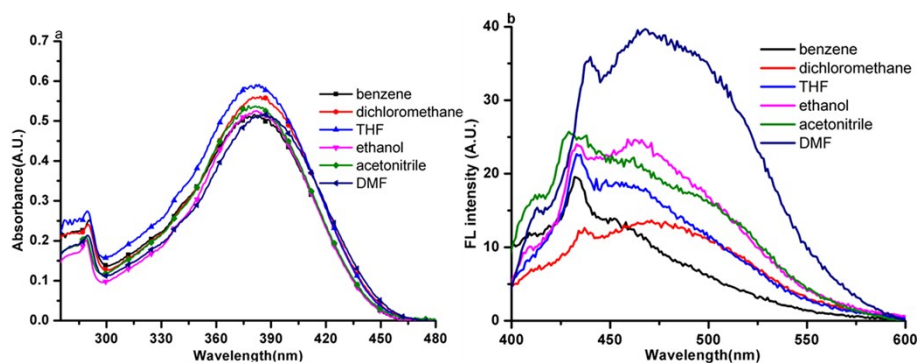

**Figure S6:** UV-Vis (a) and fluorescence (b) spectra of compound **6** in six organic solvents with different polarities at a concentration of  $2 \times 10^{-5} \text{ mol L}^{-1}$ .

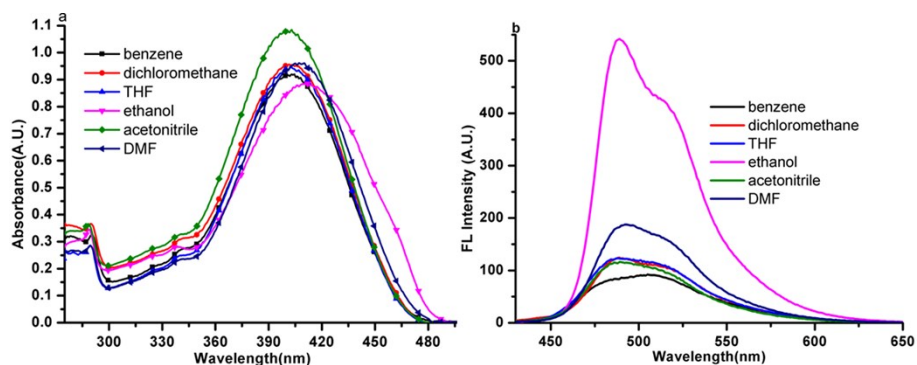



**Figure S7:** UV-Vis (a) and fluorescence (b) spectra of compound **2** in water/acetonitrile mixtures with different  $f_w$  at a concentration of  $2.0 \times 10^{-5}$  M.

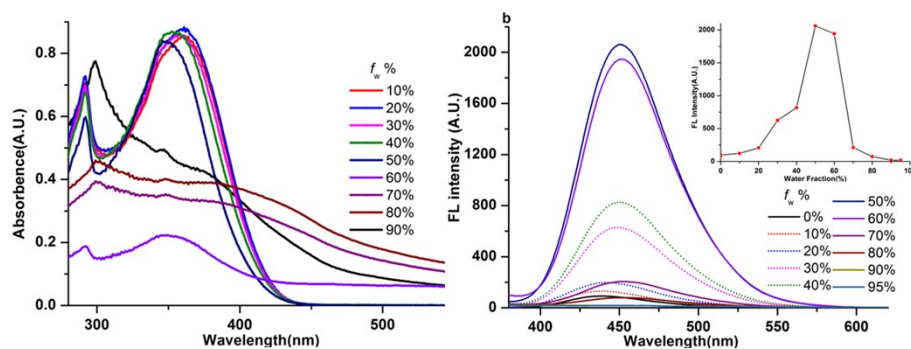

**Figure S8:** UV-Vis (a) and fluorescence (b) spectra of compound **3** in water/acetonitrile mixtures with different  $f_w$  at a concentration of  $2.0 \times 10^{-5}$  M.

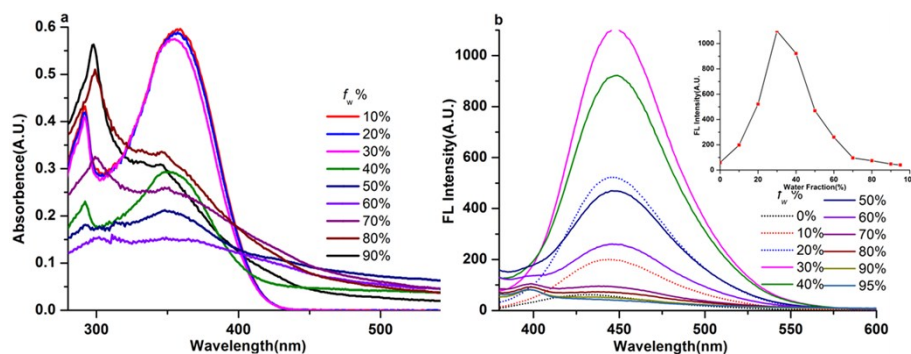

**Figure S9:** UV-Vis (a) and fluorescence (b) spectra of compound **4** in water/acetonitrile mixtures with different  $f_w$  at a concentration of  $2.0 \times 10^{-5}$  M.

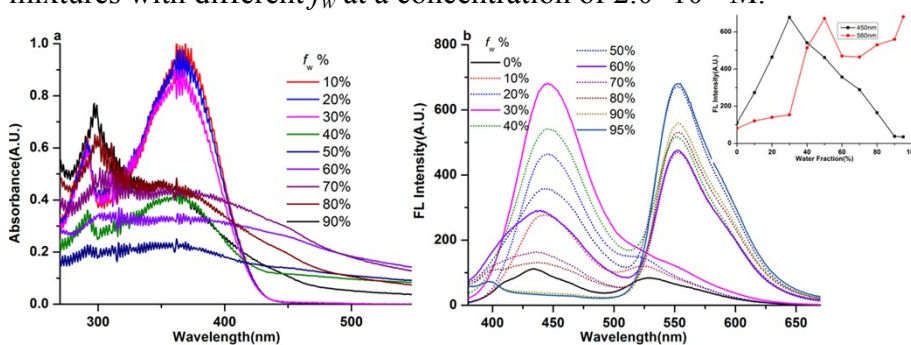

**Figure S10:** UV-Vis (a) and fluorescence (b) spectra of compound **5** in water/acetonitrile mixtures with different  $f_w$  at a concentration of  $2.0 \times 10^{-5}$  M.

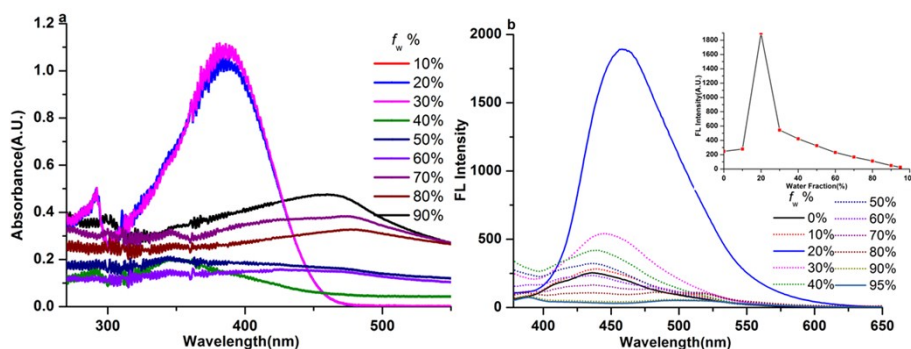



**Figure S11:** MTT assay of Hela cells treated with compounds **1-6** at different concentrations for 24 h

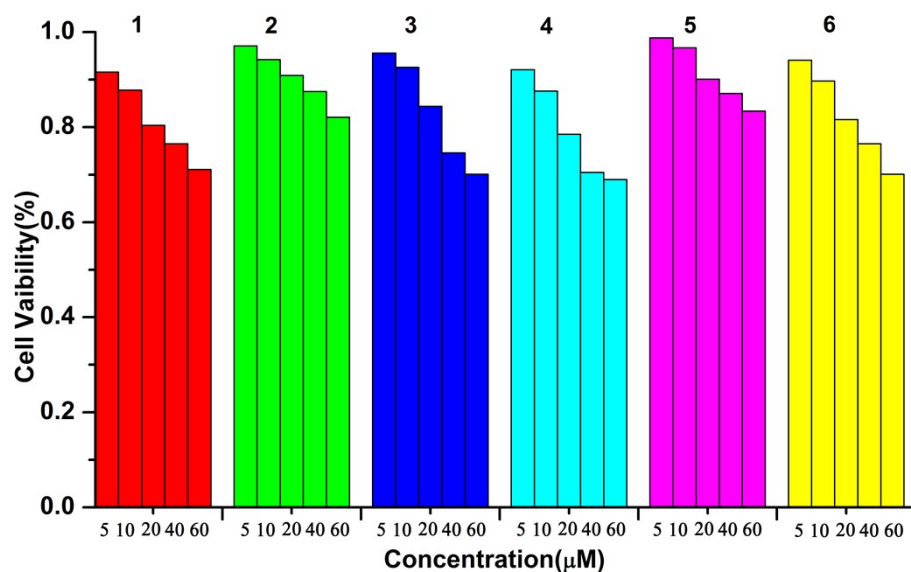

**Table S1** Crystal data of compounds **1, 2, 3, 5** and **6**

| Compounds                                | <b>1</b>                                       | <b>2</b>                                       | <b>3</b>                                       | <b>5</b>                                       | <b>6</b>                                         |
|------------------------------------------|------------------------------------------------|------------------------------------------------|------------------------------------------------|------------------------------------------------|--------------------------------------------------|
| Empirical formula                        | C <sub>32</sub> H <sub>23</sub> N <sub>3</sub> | C <sub>32</sub> H <sub>23</sub> N <sub>3</sub> | C <sub>33</sub> H <sub>24</sub> N <sub>2</sub> | C <sub>37</sub> H <sub>33</sub> N <sub>3</sub> | C <sub>37</sub> H <sub>33</sub> N <sub>3</sub> O |
| Formula weight                           | 449.53                                         | 449.53                                         | 448.54                                         | 519.66                                         | 535.66                                           |
| Crystal system                           | <i>monoclinic</i>                              | <i>monoclinic</i>                              | <i>monoclinic</i>                              | <i>triclinic</i>                               | <i>tetragonal</i>                                |
| Space group                              | C2/c                                           | C2/c                                           | C2/c                                           | P-1                                            | Pna21                                            |
| a[Å]                                     | 17.791(4)                                      | 37.005(8)                                      | 36.888(6)                                      | 9.806(3)                                       | 16.383(5)                                        |
| b[Å]                                     | 6.3822(15)                                     | 11.212(2)                                      | 11.0226(19)                                    | 17.473(4)                                      | 11.090(5)                                        |
| c[Å]                                     | 42.441(10)                                     | 45.528(10)                                     | 46.003(8)                                      | 35.205(9)                                      | 31.475(5)                                        |
| α[°]                                     | 90.00                                          | 90.00                                          | 90.00                                          | 104.3700                                       | 90.00                                            |
| β[°]                                     | 93.833(3)                                      | 91.208(3)                                      | 92.876(2)                                      | 96.872(3)                                      | 90.00                                            |
| γ[°]                                     | 90.00                                          | 90.00                                          | 90.00                                          | 90.00                                          | 90.00                                            |
| V[Å <sup>3</sup> ]                       | 4808.2(19)                                     | 18886(7)                                       | 18681(5)                                       | 5799(3)                                        | 5719(3)                                          |
| Z                                        | 8                                              | 32                                             | 32                                             | 8                                              | 8                                                |
| T[K]                                     | 296(2)                                         | 296(2)                                         | 296(2)                                         | 296(2)                                         | 293(2)                                           |
| D <sub>calcd</sub> [g·cm <sup>-3</sup> ] | 1.242                                          | 1.265                                          | 1.276                                          | 1.191                                          | 1.244                                            |
| F(000)                                   | 1888.0                                         | 7552.0                                         | 7552.0                                         | 2208.0                                         | 2272.0                                           |
| μ[mm <sup>-1</sup> ]                     | 0.073                                          | 0.075                                          | 0.074                                          | 0.070                                          | 0.075                                            |
| θrange[°]                                | 0.96-25.00                                     | 1.10-25.00                                     | 0.89-25.00                                     | 1.20-25.00                                     | 1.29-25.00                                       |
| Total no. data                           | 4233                                           | 16569                                          | 16400                                          | 20014                                          | 10077                                            |
| No. unique data                          | 2611                                           | 7083                                           | 7368                                           | 4888                                           | 7322                                             |
| R <sub>int</sub>                         | 0.0436                                         | 0.0809                                         | 0.0955                                         | 0.0766                                         | 0.0468                                           |
| R <sub>1</sub>                           | 0.0660                                         | 0.1690                                         | 0.0849                                         | 0.1070                                         | 0.0678                                           |
| wR <sub>2</sub>                          | 0.2339                                         | 0.2257                                         | 0.3329                                         | 0.3982                                         | 0.2224                                           |
| GOF                                      | 1.081                                          | 1.008                                          | 0.977                                          | 0.842                                          | 1.059                                            |
